# Supplementary material for: Protonic ceramic electrochemical cells for hydrogen production from seawater electrolysis
Source: Royal Society of Chemistry journal article supplement (doi:10.1039/d4ta05666c), 2024-01-01
Supplement: d4ta05666c1.pdf [file d4ta05666c1.pdf]

**Supporting information**

**Protonic ceramic electrochemical cells for hydrogen production from seawater  
electrolysis**

Zhiwei Du<sup>1</sup>, Wenjie Gong<sup>1</sup>, Kang Xu, Feng Zhu, Xirui Zhang, and Yu Chen\*

*School of Environment and Energy, South China University of Technology,  
Guangzhou 510006, China*

E-mail: eschenyu@scut.edu.cn

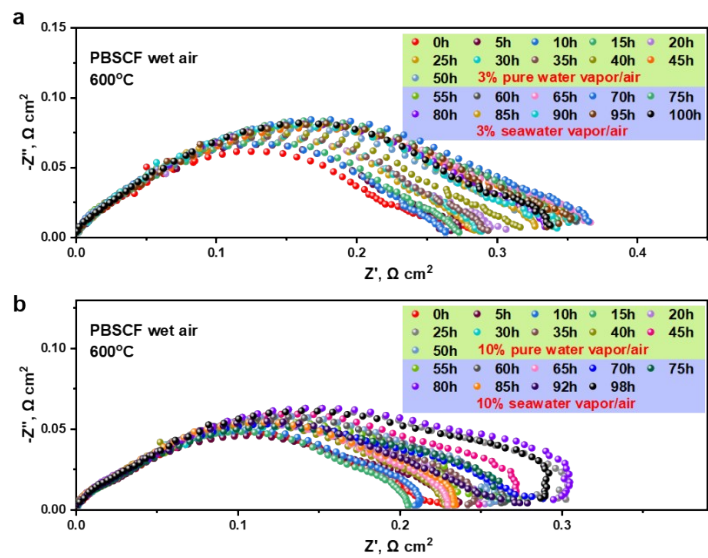

**Fig. S1.** The EIS curves for stability testing of PBSCF air electrode under **(a)** 3% vapor/air **(b)** 10%vapor/air conditions at 600 °C.

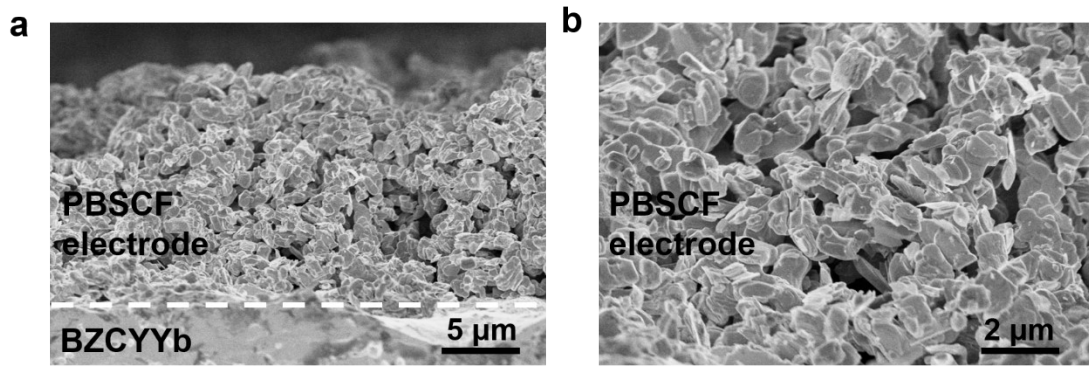

**Fig. S2.** (a) SEM image of PBSCF symmetrical cell after the 50h durability test in 3% seawater vapor/air conditions at 600 °C; (b) Magnified SEM image of the PBSCF electrode.

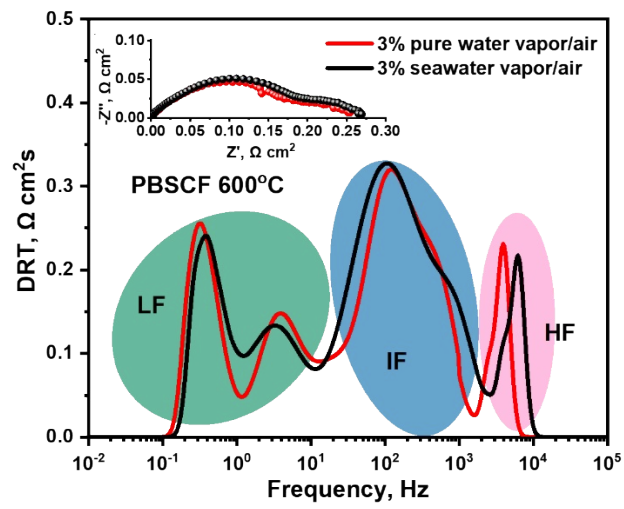

**Fig. S3.** DRT analysis of PBSCF air electrode measured at 3% pure water vapor/air and 3% seawater vapor/air conditions; inset are the corresponding EIS curves at 600 °C.

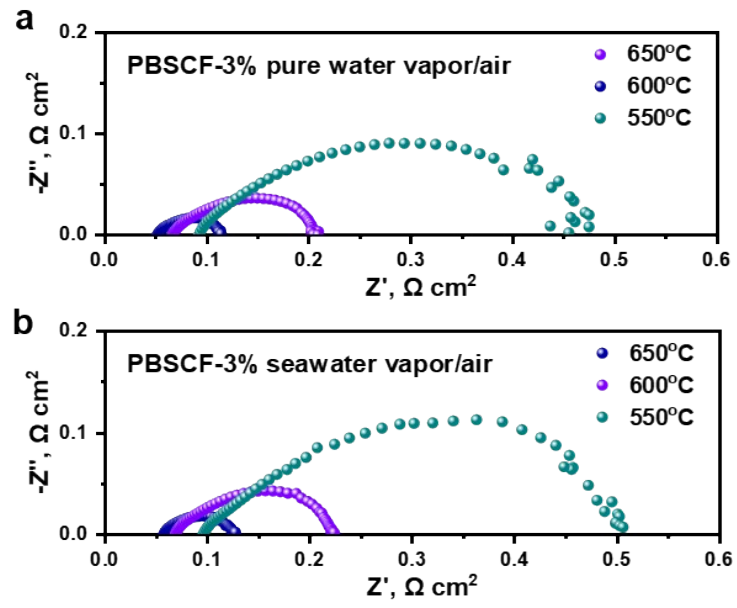

**Fig. S4.** Typical EIS of the PBSCF single cells tested in (a) 3% pure water vapor/air conditions and (b) 3% seawater vapor/air conditions from 550-650 °C.

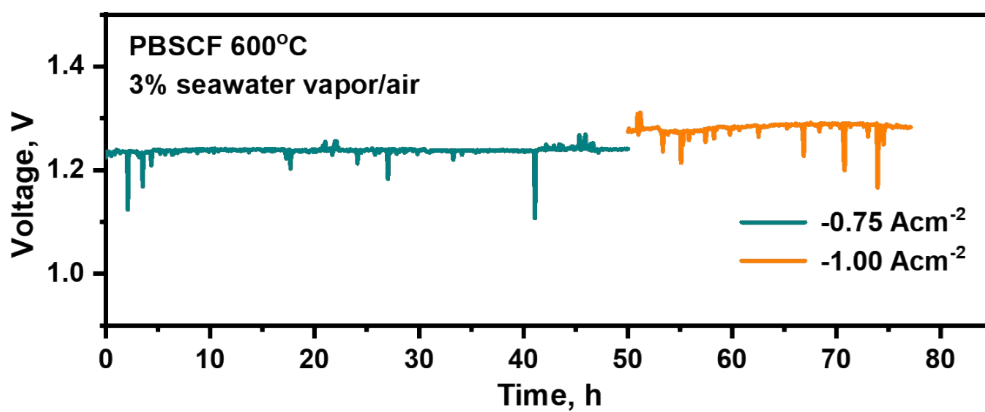

**Fig. S5.** Short-term electrolytic durability tested in 3% seawater vapor/air at current densities of  $-0.5 \text{ A cm}^{-2}$  and  $-1.00 \text{ A cm}^{-2}$  at  $600 \text{ }^\circ\text{C}$ .

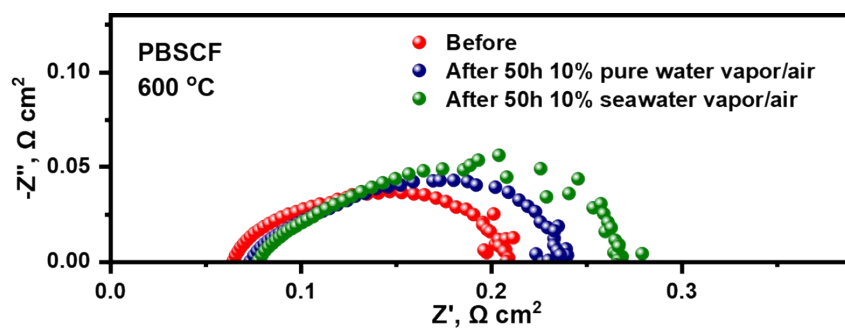

**Fig S6.** EIS of PCEC with PBSCF electrode before and after 100h stability test in EC mode at 600 °C.

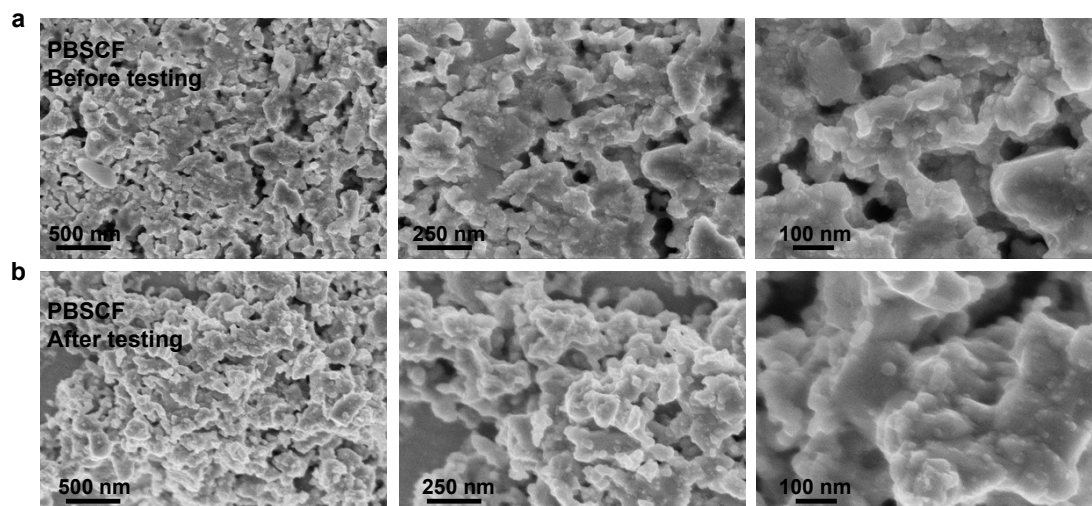

**Fig. S7.** SEM images of PBSCF electrodes on single cells before **(a)** and after **(b)** electrolytic stability test in 3% seawater vapor/air conditions for 50 h at 600 °C.



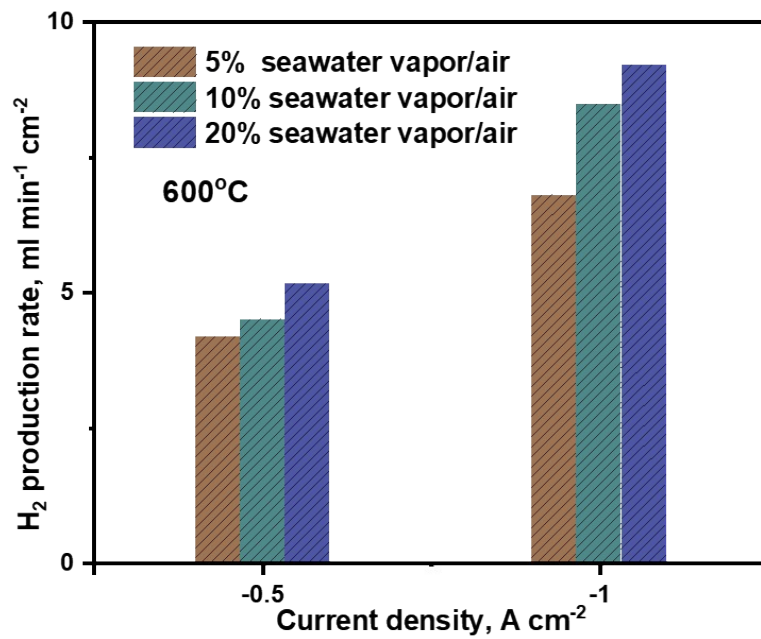

**Fig. S8.** The H<sub>2</sub> production rates of the PCEC with PBSCF air electrode at -0.5 and -1 A cm<sup>-2</sup> in wet air with 5, 10, and 20 vol.% seawater vapor/air at 600 °C.

**Table S1.** The ASRs of PBSCF symmetrical cells tested under 3% pure water and seawater vapor.

|                                                                    | <b>700°C</b> | <b>650°C</b> | <b>600°C</b> | <b>550°C</b> | <b>500°C</b> |
|--------------------------------------------------------------------|--------------|--------------|--------------|--------------|--------------|
| <b>Pure water-<br/>ASR (<math>\Omega \cdot \text{cm}^2</math>)</b> | 0.086        | 0.149        | 0.254        | 0.511        | 1.432        |
| <b>Seawater-<br/>ASR (<math>\Omega \cdot \text{cm}^2</math>)</b>   | 0.087        | 0.158        | 0.269        | 0.554        | 1.508        |

**Table S2.** The single-cell performance, including fuel cell (FC), electrolysis cell (EC), ohmic resistance ( $R_o$ ), and polarization resistance ( $R_p$ ) tested at 3% pure water vapor.

| 3% pure water<br>vapor | PPDs ( $W \cdot cm^{-2}$ ) | Current                          | $R_o$ ( $\Omega \cdot cm^2$ ) | $R_p$ ( $\Omega \cdot cm^2$ ) |
|------------------------|----------------------------|----------------------------------|-------------------------------|-------------------------------|
|                        |                            | density<br>( $A \cdot cm^{-2}$ ) |                               |                               |
| 650°C                  | 1.732                      | -3.575                           | 0.052                         | 0.063                         |
| 600°C                  | 1.429                      | -2.563                           | 0.068                         | 0.142                         |
| 550°C                  | 1.059                      | -1.218                           | 0.093                         | 0.383                         |

**Table S3.** The single-cell performance, including fuel cell (FC), electrolysis cell (EC), ohmic resistance ( $R_o$ ), and polarization resistance ( $R_p$ ) tested at 3% seawater vapor.

| 3% seawater<br>vapor | PPDs ( $W \cdot cm^{-2}$ ) | Current                          |                               |                               |
|----------------------|----------------------------|----------------------------------|-------------------------------|-------------------------------|
|                      |                            | density<br>( $A \cdot cm^{-2}$ ) | $R_o$ ( $\Omega \cdot cm^2$ ) | $R_p$ ( $\Omega \cdot cm^2$ ) |
| 650°C                | 1.658                      | -3.319                           | 0.058                         | 0.070                         |
| 600°C                | 1.388                      | -2.392                           | 0.070                         | 0.151                         |
| 550°C                | 1.025                      | -1.075                           | 0.097                         | 0.403                         |
